# Supplementary material for: Upregulation of VSIG4 in Type 2 Diabetic Kidney Disease
Source: MDPI journal article supplement (doi:10.3390/life12071031), 2022-07-11

Supplementary Table S1. Primer sequences for quantitative RT-PCR.

| Target gene             | Primer sequence (5' to 3') |
|-------------------------|----------------------------|
| VSIG4, forward          | TCCCTGGCTTCCTTTCTTCT       |
| VSIG4, reverse          | CCA AAC CCA GGA TTT CTC AA |
| TGF $\beta$ , forward   | AGCCCGAAGCGGACTACTAT       |
| TGF $\beta$ , reverse   | CTGTGTGAGATGTCTTTGGTTTTTC  |
| PAI-1, forward          | TCCTCATCCTGCCTAAGTTCTC     |
| PAI-1, reverse          | GTGCCGCTCTCGTTTACCTC       |
| Col 4, forward          | GCTCTGGCTGTGGAAAATGT       |
| Col 4, reverse          | CTTGCATCCCGGGAAATC         |
| $\beta$ -actin, forward | GGACTCCTATGTGGGTGACG       |
| $\beta$ -actin, reverse | CTTCTCCATGTCGTCCCAGT       |

Supplementary Figure S1. Representative immunohistochemical staining for VSIG4.

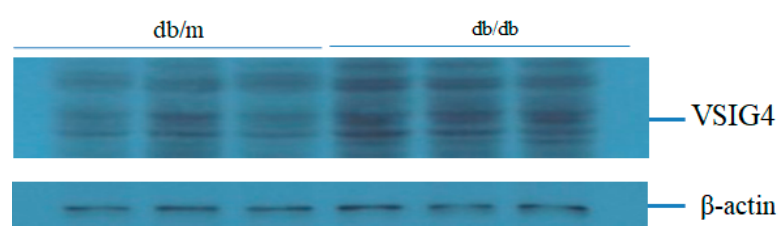

Supplementary Figure S2. Representative immunohistochemical staining. (A) PAS; (B) TGF- $\beta$ ; (C) PAI-1; (D) type IV collagen. Original magnification x 400. (E) Semiquantitative expression of each molecule \*  $P < 0.05$  vs. db/m.

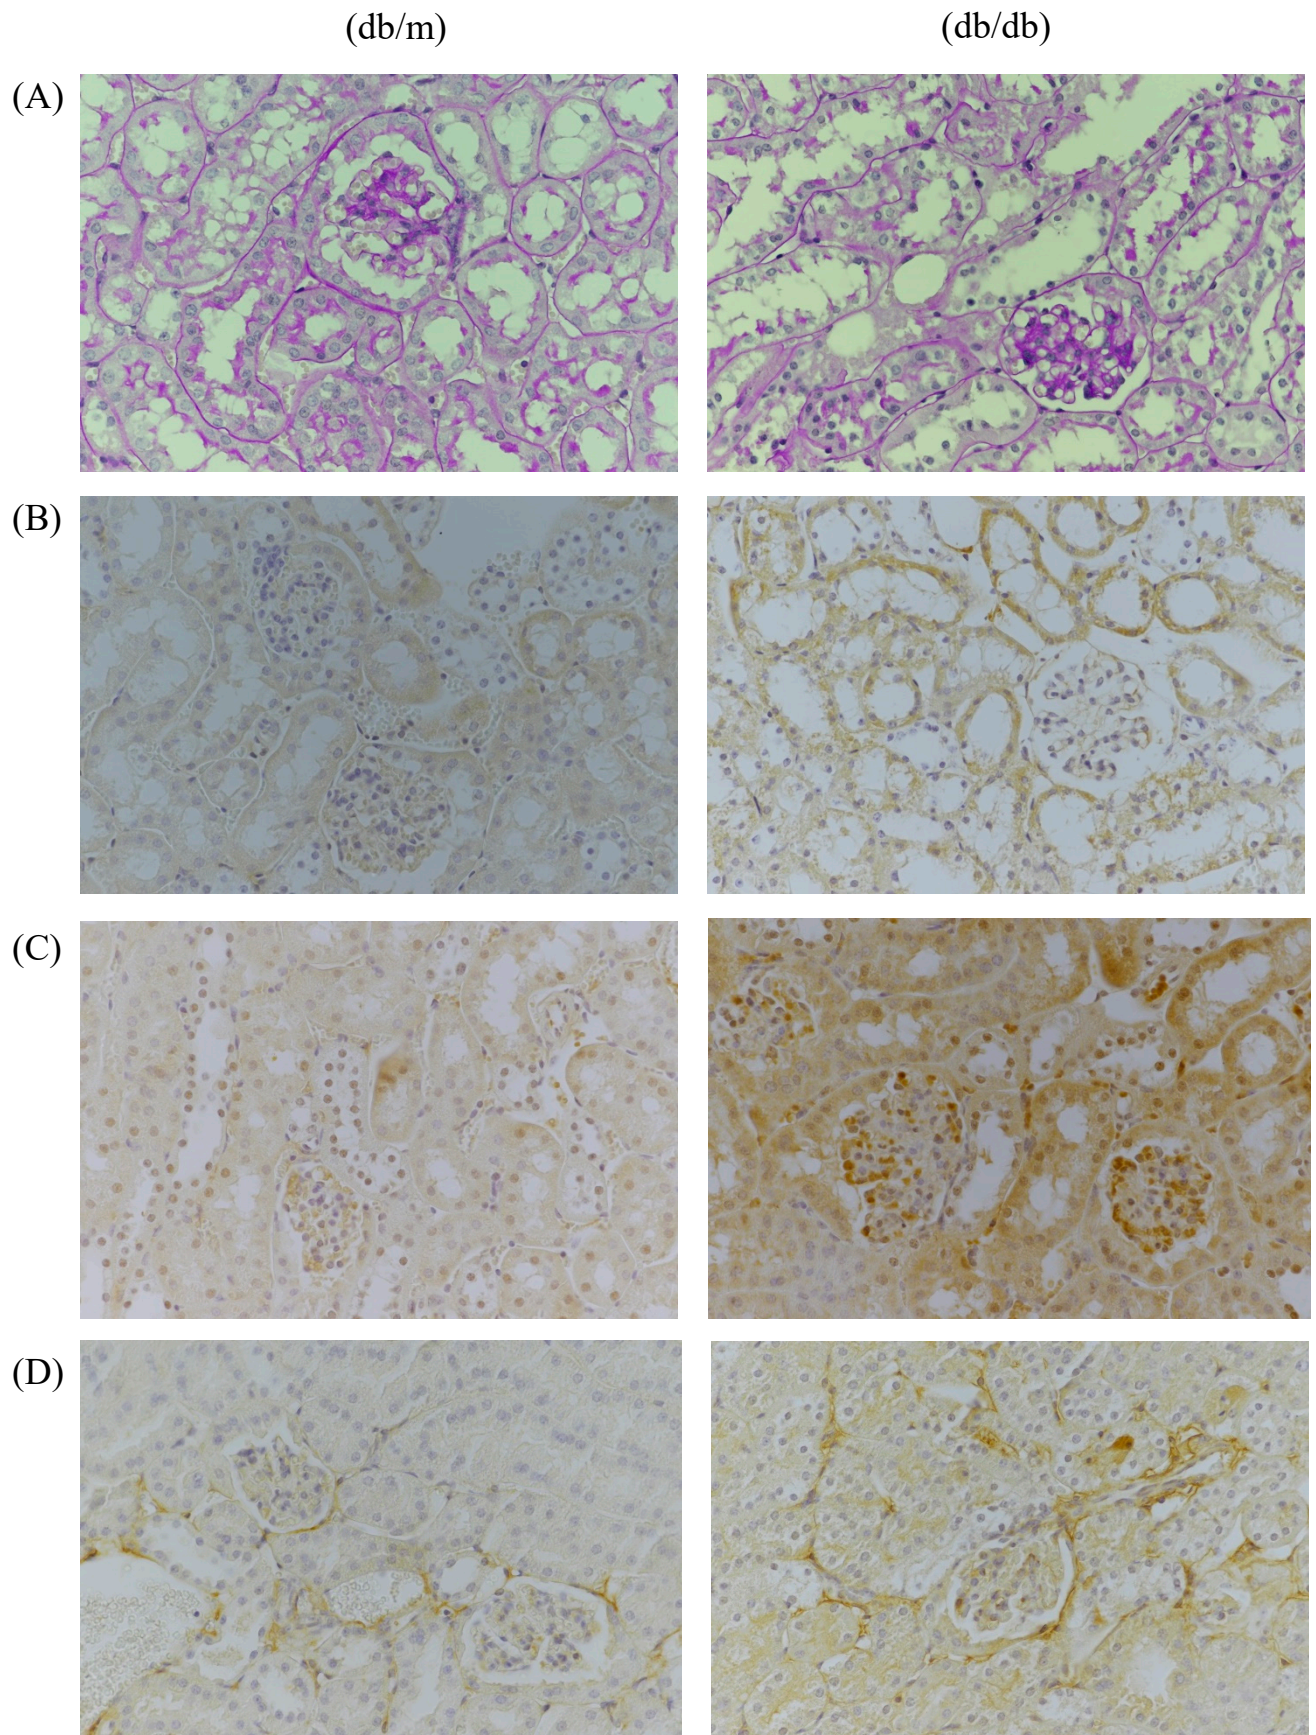

(E)

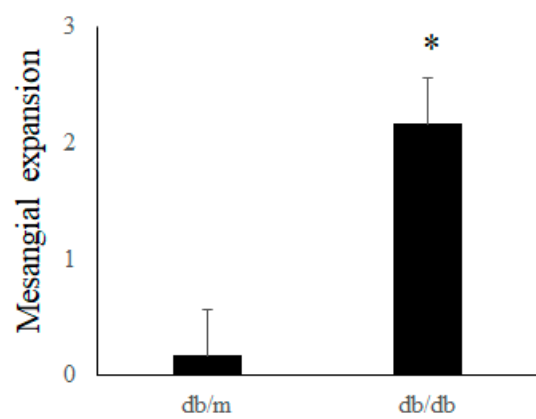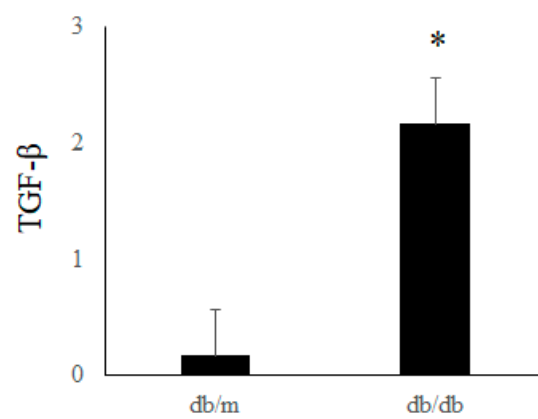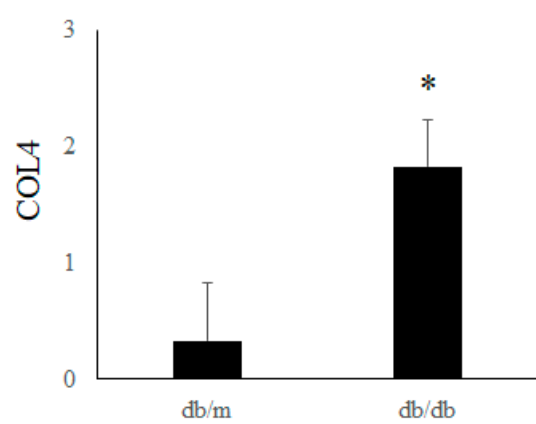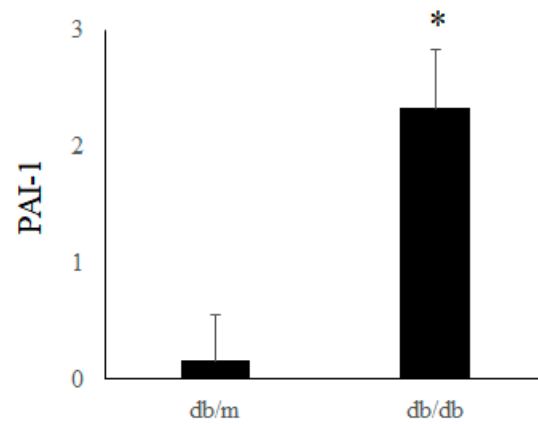

Supplement: s1 [file s1]
